# Supplementary material for: CLEC10A is a Potential Prognostic Biomarker and Immune Regulator of Tumor Microenvironment in Breast Cancer
Source: Research Square preprint supplement (doi:10.21203/rs.3.rs-295872/v1), 2021-03-17
Supplement: Supplementary file 2 [file f952037311f34ba07f84e3a0.docx]

Supplement Table 2. Correlation of tumor microenvironment score with clinicopathological characteristics of breast cancer.

| **Characteristics** | **Number of cases** | **StromalScore** | | | |  | **ImmuneScore** | | | | |  | **ESTIMATEScore** | | | |
| --- | --- | --- | --- | --- | --- | --- | --- | --- | --- | --- | --- | --- | --- | --- | --- | --- |
| Median | H | *p* | |  | | Median | H | *p* | |  | Median | H | *p* | |
| **Age (years)** | n=1034 |  | -2.128* | | 0.033 |  |  | | -2.001* | | 0.045 |  |  | -2.468* | | 0.014 |
| ≤65 | 738 | 558.44 |  |  | |  | 692.22 | |  |  | |  | 1332.6 |  |  | |
| >65 | 296 | 434.25 |  |  | |  | 556.21 | |  |  | |  | 1043.3 |  |  | |
| **T classification** | n=1031 |  | 14.928 | 0.002 | |  |  | | 4.946 | 0.176 | |  |  | 9.597 | 0.022 | |
| T1 | 268 | 692.17 |  |  | |  | 727.87 | |  |  | |  | 1445.6 |  |  | |
| T2 | 600 | 484.16 |  |  | |  | 656.11 | |  |  | |  | 1138.4 |  |  | |
| T3 | 128 | 503.21 |  |  | |  | 673.64 | |  |  | |  | 1264.7 |  |  | |
| T4 | 35 | 413.87 |  |  | |  | 327.41 | |  |  | |  | 694.95 |  |  | |
| **N classification** | n=1014 |  | 6.703 | 0.082 | |  |  | | 3.028 | 0.387 | |  |  | 3.02 | 0.389 | |
| N0 | 477 | 489.49 |  |  | |  | 639.65 | |  |  | |  | 1177.6 |  |  | |
| N1 | 345 | 541.82 |  |  | |  | 631.44 | |  |  | |  | 1223.3 |  |  | |
| N2 | 118 | 630.07 |  |  | |  | 700.08 | |  |  | |  | 1349.6 |  |  | |
| N3 | 74 | 653.83 |  |  | |  | 792.42 | |  |  | |  | 1549.3 |  |  | |
| **M classification** | n=881 |  | 0.534* | 0.465 | |  |  | | 0.599* | 0.439 | |  |  | 0.667* | 0.414 | |
| M0 | 860 | 526.06 |  |  | |  | 635.89 | |  |  | |  | 1205.9 |  |  | |
| M1 | 21 | 396.87 |  |  | |  | 431.67 | |  |  | |  | 804.4 |  |  | |
| **Clinical Stage** | n=1011 |  | 10.484 | 0.015 | |  |  | | 0.838 | 0.84 | |  |  | 3.799 | 0.284 | |
| Stage Ⅰ | 171 | 633.69 |  |  | |  | 587.33 | |  |  | |  | 1396 |  |  | |
| StageⅡ | 587 | 476.5 |  |  | |  | 652.69 | |  |  | |  | 1100.9 |  |  | |
| StageⅢ | 234 | 622.02 |  |  | |  | 680.9 | |  |  | |  | 1363.1 |  |  | |
| StageⅣ | 19 | 481.42 |  |  | |  | 431.67 | |  |  | |  | 960.33 |  |  | |
| Correlations between clinicopathological parameters and TME scores by Mann-Whitney U test* or Kruskal-Wallis test.  *：*Z*-value | | | | | | | | | | | | | | | | |
